# Supplementary material
Source: PubMed Central journal article supplement (PMC3592566)

Supplemental Figure 1

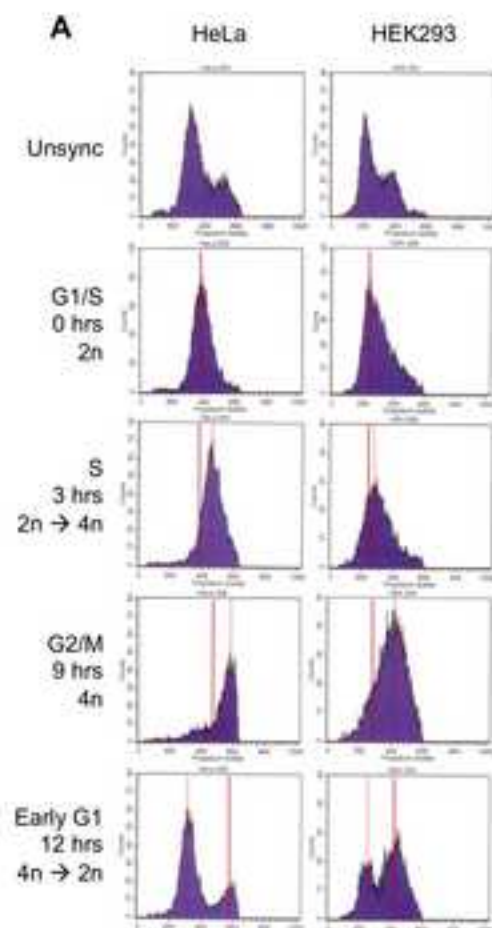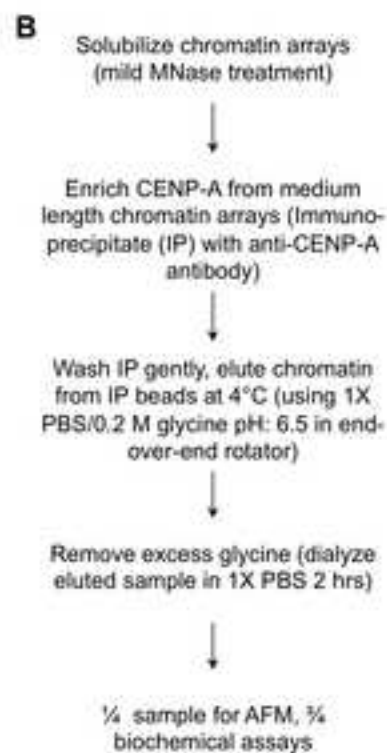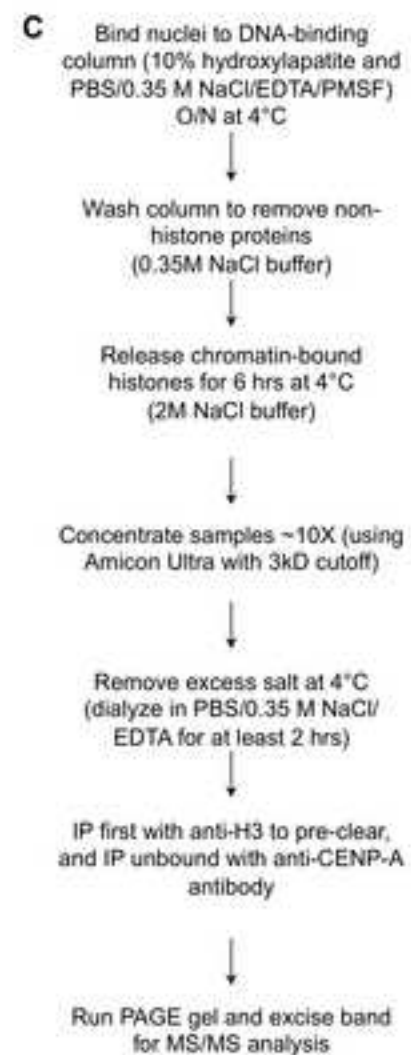

Supplemental Figure 2

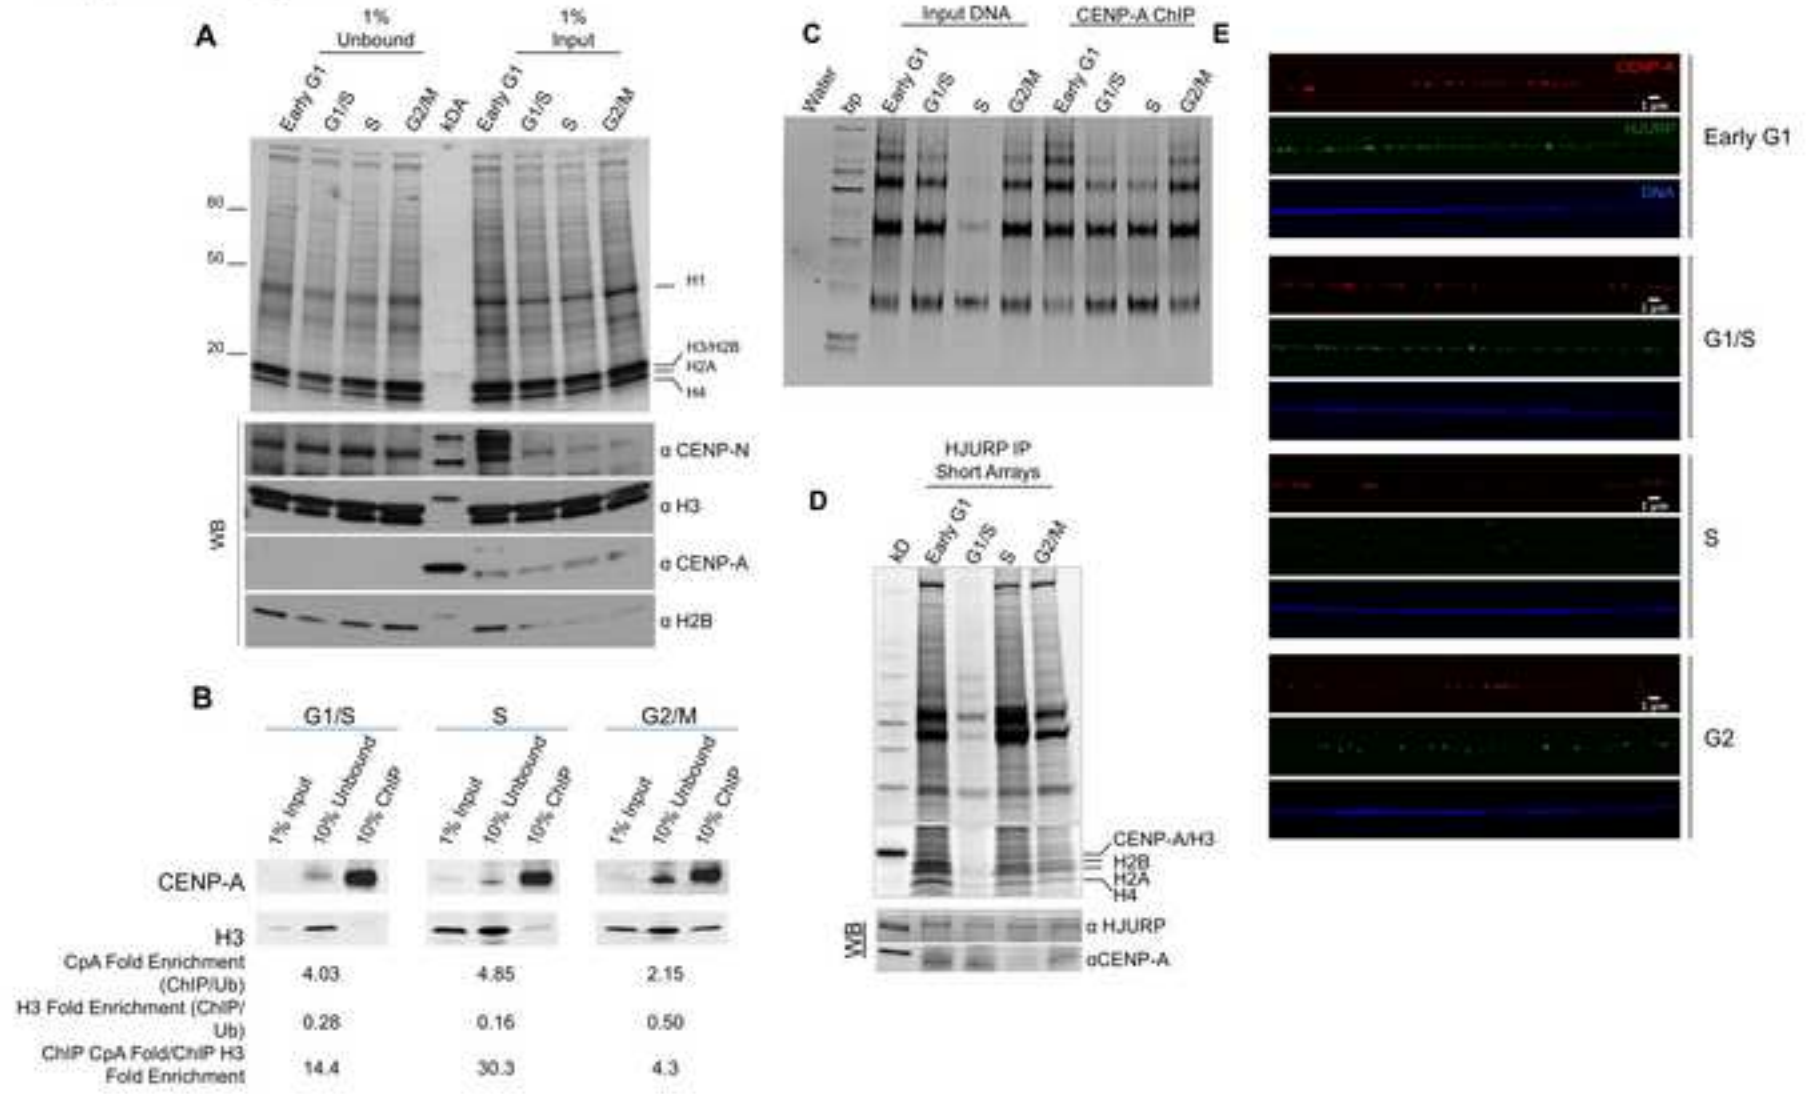

Supplemental Figure 3

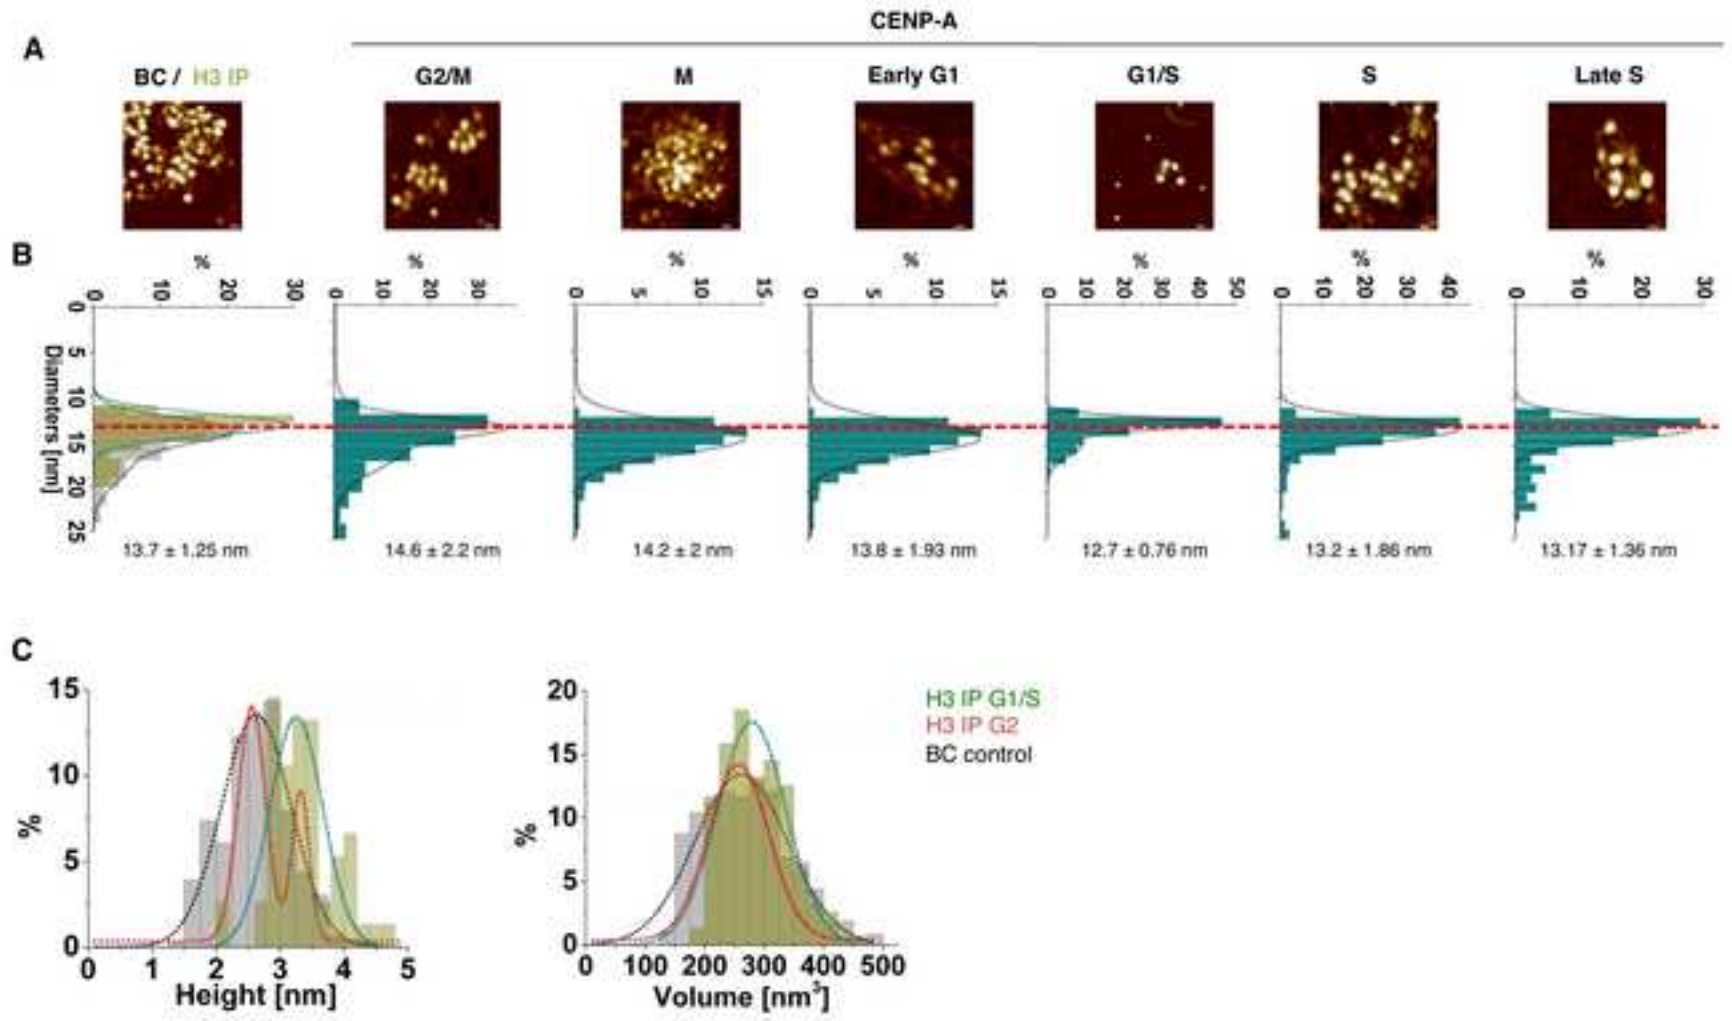

Supplemental Figure 4

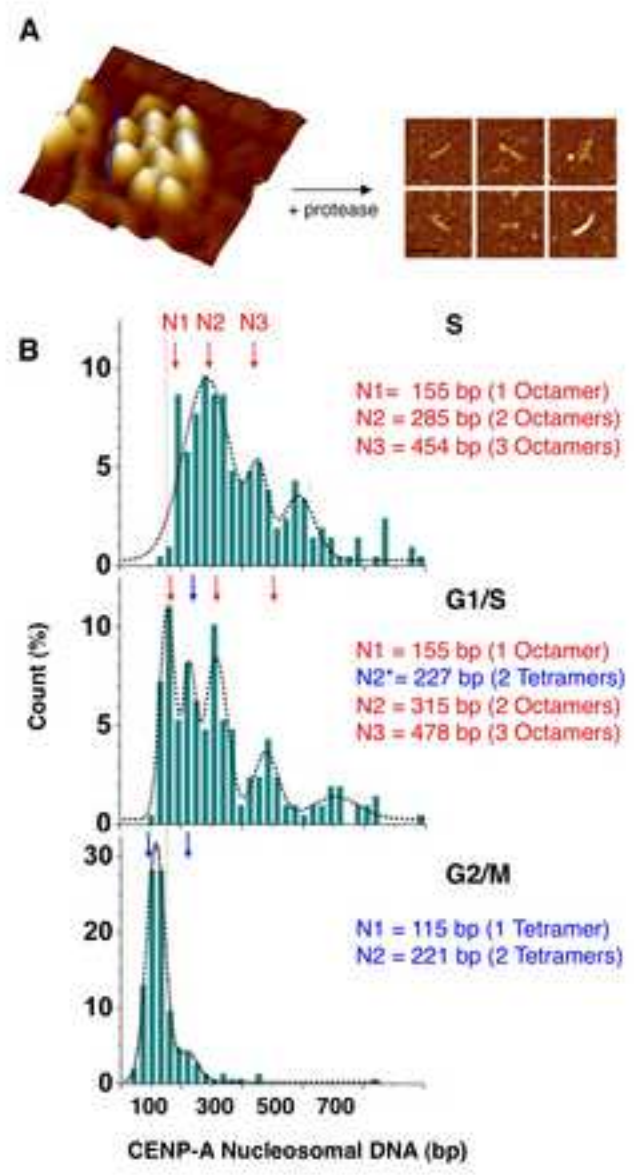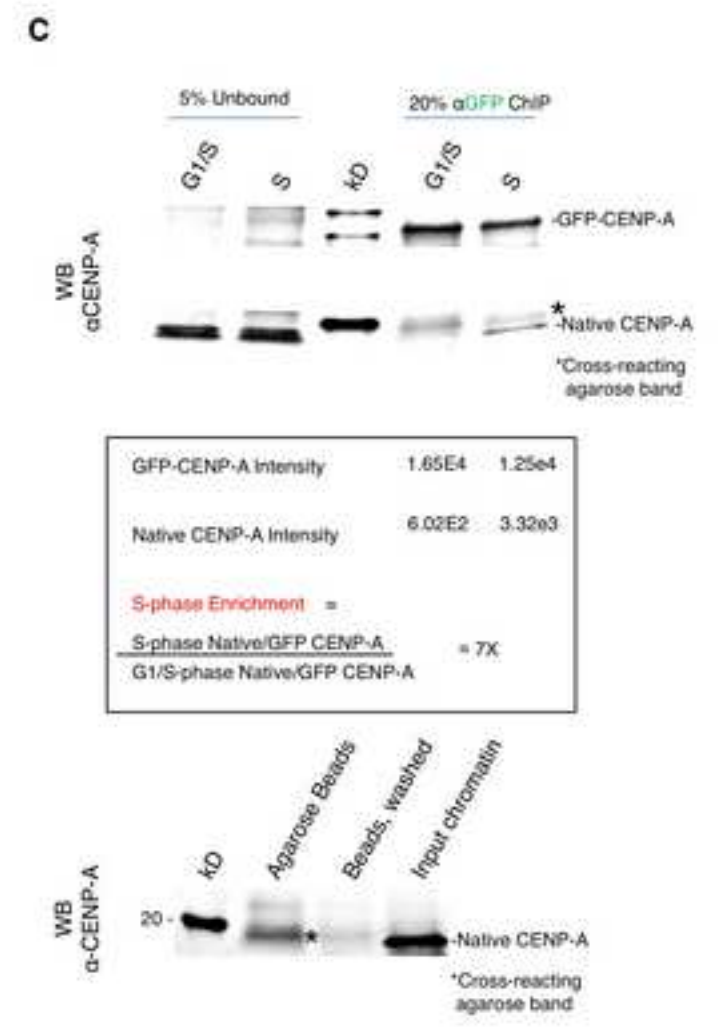

## Supplemental Figure 5

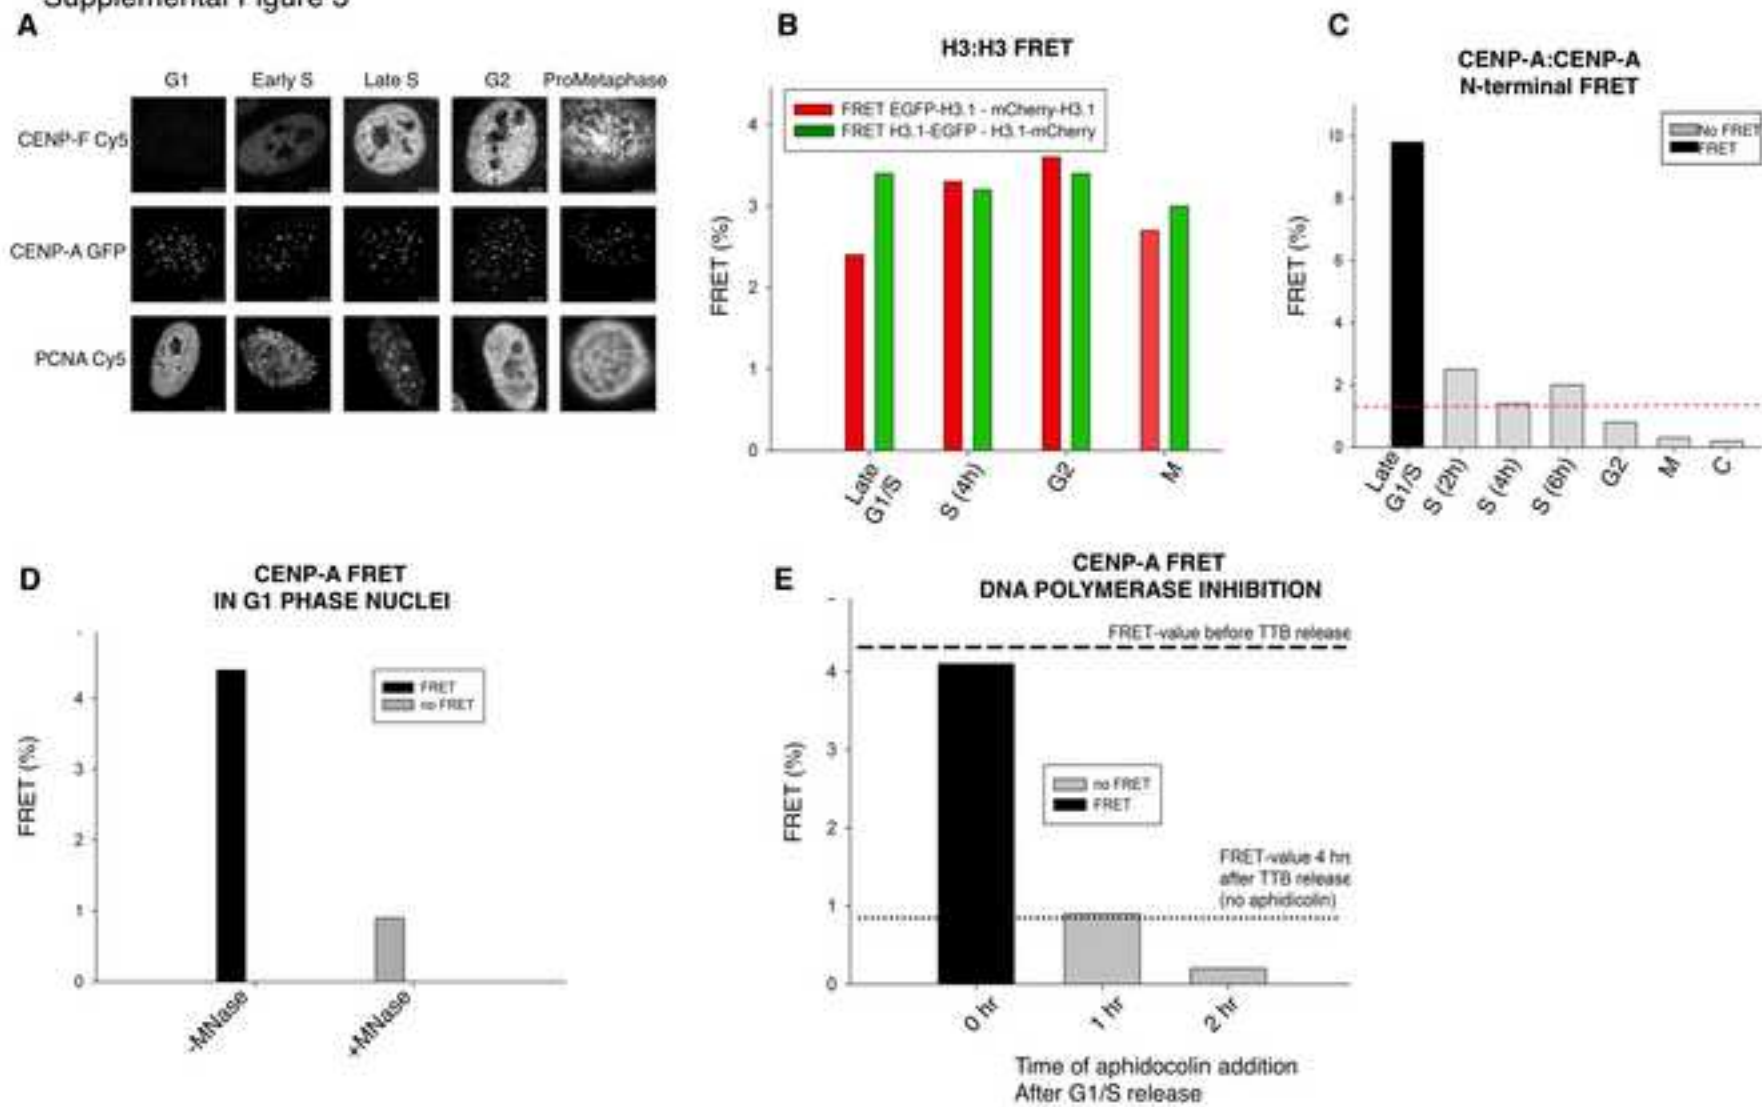

Supplemental Figure 6

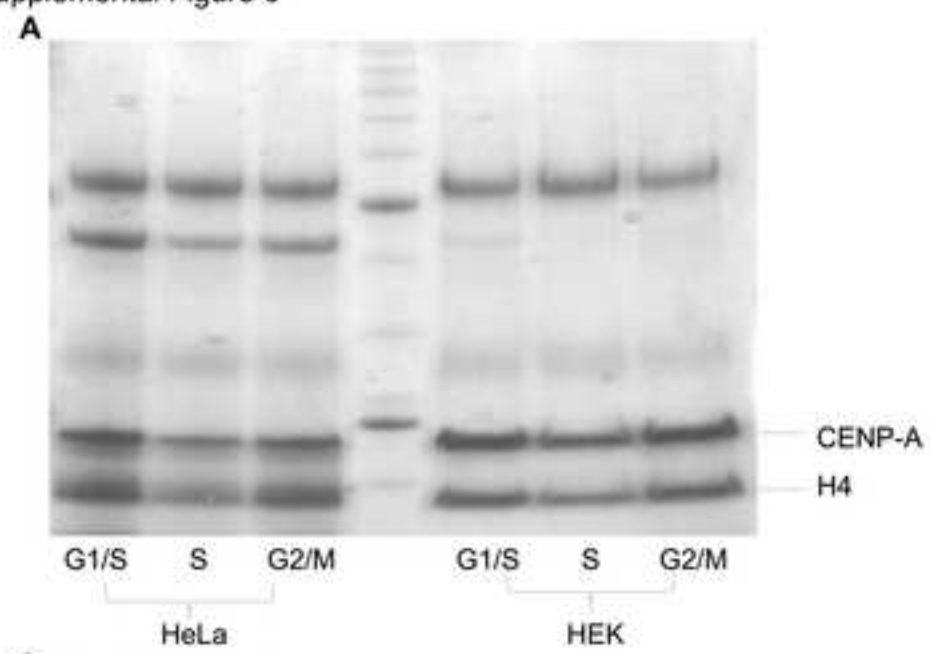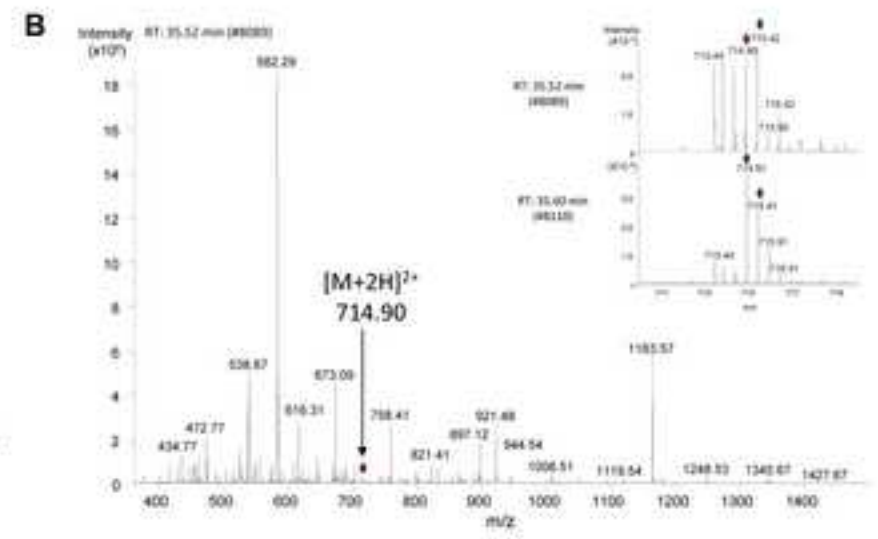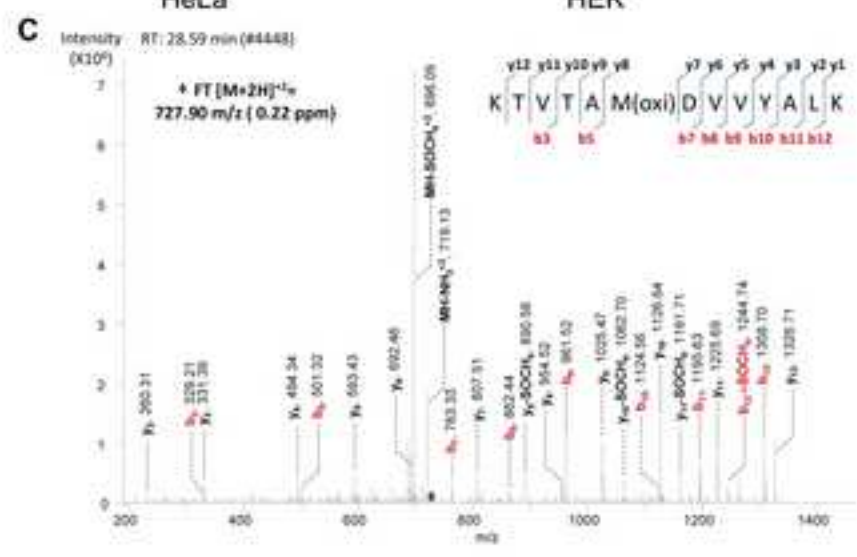

Supplemental Figure 7

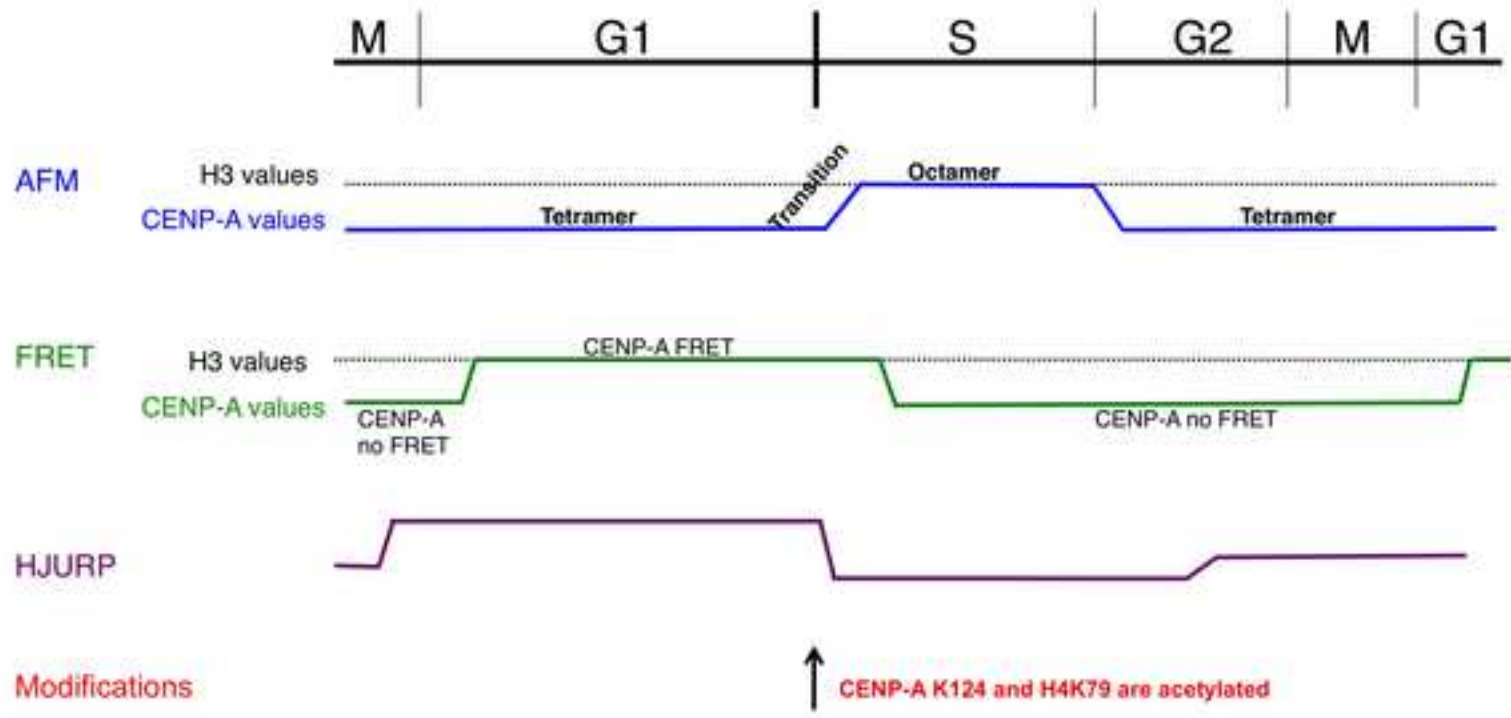

Supplement: NIHMS387393-supplement-02.pdf [file NIHMS387393-supplement-02.pdf]
